# Supplementary material
Source: MDPI journal article supplement (https://www.mdpi.com/2073-4441/13/19/2768)
Supplement: s1 [file s1 › water-1373242-supplementary.pdf]

# Insights into the Simultaneous Sorption of Ciprofloxacin and Heavy Metals Using Functionalized Biochar

Agnieszka Cuprys <sup>1,2,\*</sup>, Zakhar Maletskyi <sup>2</sup>, Tarek Rouissi <sup>1,3</sup>, Harsha Ratnaweera <sup>2</sup>, Satinder Kaur Brar <sup>1,4,\*</sup>, Émile Knystautas <sup>5</sup> and Patrick Drogui <sup>1</sup>

## Supplementary data

### Adsorption of contaminants onto raw biochar

To generate CH-BB, suitable raw biochar had to be chosen. Biochar's feedstock strongly depends on pollutants' adsorption properties [1]. The details of their fabrication are presented in Table S1.

It is associated with different functional groups that could potentially attract the contaminants, as shown in Figure S1. Hence, the comparison of adsorption capacity between PW-BC, AS-BC, and PM-BC was carried out. The results are presented in Table S3. All tested biochars were able to adsorb CIP and heavy metals. PM-BC exhibited the highest adsorption capacity for CIP, which can be assigned to its properties such as high surface area [2]. The  $\pi$ - $\pi$  interaction between CIP and PM-BC functional groups possibly contributed to antibiotic adsorption [1]. In a previously reported study, a higher removal efficiency was obtained due to adsorption onto PM-BC than PW-BC for another pharmaceutical, diclofenac [2]. On the other hand, PM-BC and PW-BC had the same adsorption capacity for Pb. Almost 100% of this metal was adsorbed onto both biochars, while only 72% of Pb was adsorbed onto AS-BC. PW-BC was also more efficient to remove As from the solution. The potency of PW-BC to adsorb As is consistent with previous reports [3]. AS-BC had the highest adsorption capacity towards Cd ions. Based on the overall results, the PM-BC was selected for the fabrication of CH-BB.

### Effect of pH on adsorption onto CH-BB

The influence of pH (5.0-9.0) on adsorption capacity was tested for each contaminant, where the initial concentration was 10 mg/L for CIP, As, Cd and 1 mg/L of Pb. All experiments were conducted at room temperature ( $20\pm 2^\circ\text{C}$ ), 150 rpm in an orbital shaker (PSU-20i Multi-functional Orbital Shaker, Biosan). The results are presented in Figure S0. The tested pH range had no significant effect on the removal of CIP ( $p$ -value = 0.104) and Pb ( $p$ -value = 0.114). For Cd and As, the optimum pH for removal was found to be 6.0 (Fig. S0). For CIP, the results are consistent with the report of Afzal et al. (2018), who also tested CIP removal efficiency of chitosan beads [4]. CIP has two main ionizable groups, carboxylic ( $pK_{a1}$  6.09) and piperazinyl ( $pK_{a2}$  8.74), which makes the compound amphoteric. In the tested range of pH, CIP is present in the solution as zwitterion ( $\text{CIP}^\pm$ ), hence it can adsorb onto CH-BB when its surface is protonated ( $\text{pH} < 6$ ) or negatively charged ( $\text{pH} > 6$ ) [5]. Moreover, a further increase in pH would result in a decrease of CIP-adsorption potency due to the higher concentration of  $\text{CIP}^-$ , as previously suggested [4, 6].

At around pH 6, the functional groups of CH-BB containing oxygen are protonated, and they can attract most of the metals. Moreover, the presence of the amine group of chitosan ( $pK_a$  6.5) increases the number of active sites [7-9]. The adsorption capacity towards As and Cd decreased with the increase of pH above 6. At the tested pH, As is present mostly as  $\text{H}_2\text{AsO}_4^-$ , however, due to its speciation, it is not certain if this main form of As was the one that was adsorbed onto CH-BB surface [10]. In the case of Cd, the adsorption capacity increased significantly from pH 5 to 6 ( $p$ -value = 0.021) and then started to decrease gradually. Generally, at higher pH, the adsorption capacity decreases due to the generation of soluble hydroxylated complexes of the metal ions.

## References

1. Zhou, Yanmei, Bin Gao, Andrew R Zimmerman, June Fang, Yining Sun, and Xinde Cao. "Sorption of Heavy Metals on Chitosan-Modified Biochars and Its Biological Effects." *Chemical Engineering Journal* 231 (2013): 512-18.
2. Lonappan, Linson, Tarek Rouissi, Satinder Kaur Brar, Mausam Verma, and Rao Y Surampalli. "An Insight into the Adsorption of Diclofenac on Different Biochars: Mechanisms, Surface Chemistry, and Thermodynamics." *Bioresource technology* 249 (2018): 386-94.
3. Wang, Shengsen, Bin Gao, Andrew R Zimmerman, Yuncong Li, Lena Ma, Willie G Harris, and Kati W Migliaccio. "Removal of Arsenic by Magnetic Biochar Prepared from Pinewood and Natural Hematite." *Bioresource technology* 175 (2015): 391-95.
4. Afzal, Muhammad Zaheer, Xue-Fei Sun, Jun Liu, Chao Song, Shu-Guang Wang, and Asif Javed. "Enhancement of Ciprofloxacin Sorption on Chitosan/Biochar Hydrogel Beads." *Science of the Total Environment* 639 (2018): 560-69.
5. Aristilde, Ludmilla, and Garrison Sposito. "Complexes of the Antimicrobial Ciprofloxacin with Soil, Peat, and Aquatic Humic Substances." *Environmental Toxicology and Chemistry* 32, no. 7 (2013): 1467-78.
6. Afzal, Muhammad Zaheer, Rengyu Yue, Xue-Fei Sun, Chao Song, and Shu-Guang Wang. "Enhanced Removal of Ciprofloxacin Using Humic Acid Modified Hydrogel Beads." *Journal of colloid and interface science* 543 (2019): 76-83.
7. Bogusz, Aleksandra, Patryk Oleszczuk, and Ryszard Dobrowolski. "Application of Laboratory Prepared and Commercially Available Biochars to Adsorption of Cadmium, Copper and Zinc Ions from Water." *Bioresource technology* 196 (2015): 540-49.
8. Fan, Lulu, Chuannan Luo, Min Sun, Xiangjun Li, and Huamin Qiu. "Highly Selective Adsorption of Lead Ions by Water-Dispersible Magnetic Chitosan/Graphene Oxide Composites." *Colloids and Surfaces B: Biointerfaces* 103 (2013): 523-29.
9. Wan, Meng-Wei, Chi-Chuan Kan, Buenda D Rogel, and Maria Lourdes P Dalida. "Adsorption of Copper (II) and Lead (II) Ions from Aqueous Solution on Chitosan-Coated Sand." *Carbohydrate Polymers* 80, no. 3 (2010): 891-99.
10. Vithanage, Meththika, Indika Herath, Stephen Joseph, Jochen Bundschuh, Nanthi Bolan, Yong Sik Ok, M. B. Kirkham, and Jörg Rinklebe. "Interaction of Arsenic with Biochar in Soil and Water: A Critical Review." *Carbon* 113 (2017): 219-30.
11. Lagergren, Stan. "Zur Theorie Der Sogenannten Adsorption Geloster Stoffe." (1898).
12. Blanchard, G, M Maunaye, and G Martin. "Removal of Heavy Metals from Waters by Means of Natural Zeolites." *Water Research* 18, no. 12 (1984): 1501-07.
13. McLintock, IS. "The Elovich Equation in Chemisorption Kinetics." *Nature* 216, no. 5121 (1967): 1204-05.
14. Weber Jr, Walter J, and J Carrell Morris. "Kinetics of Adsorption on Carbon from Solution." *Journal of the sanitary engineering division* 89, no. 2 (1963): 31-59.
15. Langmuir, Irving. "The Adsorption of Gases on Plane Surfaces of Glass, Mica and Platinum." *Journal of the American Chemical society* 40, no. 9 (1918): 1361-403.
16. Freundlich, Herbert. "Über Die Adsorption in Lösungen." *Zeitschrift für physikalische Chemie* 57, no. 1 (1907): 385-470.
17. Redlich, OJDL, and D L Peterson. "A Useful Adsorption Isotherm." *Journal of physical chemistry* 63, no. 6 (1959): 1024-24.

## Tables

**Table S1.** Production details of used biochars.

| Type of biochar              | Composition                                                         | Pyrolysis procedure                                                                                                           |
|------------------------------|---------------------------------------------------------------------|-------------------------------------------------------------------------------------------------------------------------------|
| Pinewood biochar (PN-BC)     | softwood mix of white pine wood (80% v/v), spruce and fir (20% v/v) | 525 ± 1 °C, atmospheric pressure, 2 min, an oxygen-free environment                                                           |
| Almond shell biochar (AS-BC) | Almond shells                                                       | 520 ± 1 °C, 4 h                                                                                                               |
| Pig manure biochar (PM-BC)   | solid fraction of pig slurry                                        | 400 ± 1 °C, 2 h at 15 °C min <sup>-1</sup> in the presence of nitrogen at a flow rate of 2 L min <sup>-1</sup> during heating |

**Table S2.** Metals concentration leached from biochars and CH-BB. All concentrations are given in µg/L.

| Metal | PM-BC  | PW-BC  | AS-BC | CH-BB |
|-------|--------|--------|-------|-------|
| Al    | ND     | ND     | ND    | 356.9 |
| As    | 9.7    | 8.7    | 6.4   | 3.9   |
| Be    | 2.2    | 1.3    | 1.6   | 0.9   |
| Ca    | 1185.0 | 2670.7 | ND    | ND    |
| Cd    | 0.6    | 0.3    | 0.2   | 0.3   |
| Co    | 1.2    | 0.8    | 0.6   | 0.4   |

|    |          |         |          |        |
|----|----------|---------|----------|--------|
| K  | 127566.3 | 15123.3 | 250530.9 | ND     |
| Mg | 2933.9   | 386.2   | 621.5    | 914.7  |
| Mn | ND       | 188.6   | ND       | 8.1    |
| Mo | 2121.2   | 4564.8  | 2607.4   | 6451.5 |
| Na | 16112.1  | ND      | ND       | 5107.7 |
| Ni | 1.5      | 5.4     | 4.0      | 9.3    |
| P  | 4003.4   | 405.8   | 2377.1   | 72.6   |
| Se | 88.9     | 99.6    | 8.2      | 90.1   |
| Sr | 5.9      | 14.5    | 2.9      | 2.1    |

Abbreviations: PM-BC – pig manure biochar; PW-BC – pinewood biochar; AS-BC – almond shell biochar; CH-BB – chitosan-biochar beads; ND – not detected.

**Table S3.** Adsorption capacity of the tested adsorbents; pH 6.0, 150 rpm, 48 h.

| Contaminant (initial concentration [mg/L]) | Adsorption capacity [mg/g] |            |           |
|--------------------------------------------|----------------------------|------------|-----------|
|                                            | PM-BC                      | PW-BC      | AS-BC     |
| Ciprofloxacin (10)                         | 1.36±0.02                  | 1.05±0.08  | 1.23±0.02 |
| As (10)                                    | 0.24±0.24                  | 0.77±0.15  | 0.56±0.19 |
| Cd (10)                                    | 4.88±0.41                  | 1.06±0.08  | 6.34±0.72 |
| Pb (1)                                     | 0.99±0.004                 | 0.99±0.001 | 0.72±0.07 |

Abbreviations: PM-BC – pig manure biochar; PW-BC – pinewood biochar; AS-BC – almond shell biochar.

**Table S4.** Kinetic and adsorption models and their parameters.

| Model                                  | Equation                                                                                     | Ref. | Parameters                                                                                                                                                                                                                                                                                                                                                          |
|----------------------------------------|----------------------------------------------------------------------------------------------|------|---------------------------------------------------------------------------------------------------------------------------------------------------------------------------------------------------------------------------------------------------------------------------------------------------------------------------------------------------------------------|
| <b>Pseudo-first order (nonlinear)</b>  | <i>Eq. (S1)</i> $q_t = q_e(1 - e^{-k_1 t})$                                                  | [11] | $a_{RP}$ [(mg/L) <sup>-g</sup> ]: Redlich-Peterson constant<br>$\alpha$ [mg/g x h]: initial rate constant                                                                                                                                                                                                                                                           |
| <b>Pseudo-second order (nonlinear)</b> | <i>Eq. (S2)</i> $q_t = \frac{q_e^2 k_2 t}{1 + k_2 q_e t}$                                    | [12] | $\beta$ [mg/g]: desorption constant<br>$C_0$ [mg/L]: initial concentration of pollutant                                                                                                                                                                                                                                                                             |
| <b>Elovich (nonlinear)</b>             | <i>Eq. (S3)</i> $q_t = \frac{1}{\beta} \ln(1 + \alpha \beta t)$                              | [13] | $g$ : exponent (ranges between 0 and 1)<br>$I$ : thickness of the boundary layer                                                                                                                                                                                                                                                                                    |
| <b>Intraparticle diffusion</b>         | <i>Eq. (S5)</i> $q_t = k_p t^{1/2} + I$                                                      | [14] | $k_l$ [1/h]: the rate constant of pseudo-first-order adsorption<br>$k_2$ [g/mg h]: the rate constant of pseudo-second-order adsorption                                                                                                                                                                                                                              |
| <b>Langmuir</b>                        | <i>Eq. (S7)</i> $q_e = \frac{q_m K_L C_e}{1 + K_L C_e}$<br>$R_L = \frac{1}{1 + K_L q_m C_0}$ | [15] | $K_F$ [(mg/g)(L/mg) <sup>1/n</sup> ]: the Freundlich adsorption constant<br>$K_L$ [L/mg]: the Langmuir adsorption constant<br>$K_{RP}$ [L/g]: Redlich-Peterson constant<br>$k_p$ [mg/g h <sup>1/2</sup> ]: the intraparticle diffusion rate constant                                                                                                                |
| <b>Freundlich</b>                      | <i>Eq. (S10)</i> $q_e = K_F C_e^n$                                                           | [16] | $n$ : the empirical parameter relating the adsorption intensity, which varies with the heterogeneity of the material (dimensionless)<br>$q_e$ [mg/g]: the adsorption capacity at equilibrium<br>$q_m$ [mg/g]: complete monolayer adsorption capacity<br>$q_t$ [mg/g]: the adsorption capacity at time $t$<br>$R_L$ : equilibrium parameter<br>$t$ [h]: contact time |
| <b>Redlich–Peterson</b>                | <i>Eq. (S12)</i> $q_e = \frac{K_{RPP} C_e}{1 + a_{RPP} C_e^g}$                               | [17] |                                                                                                                                                                                                                                                                                                                                                                     |

**Table S5.** Comparison of targeted heavy metals.

| <b>Metal</b>                          | <b>As</b>                                             | <b>Cd</b>                             | <b>Pb</b>                                                              |
|---------------------------------------|-------------------------------------------------------|---------------------------------------|------------------------------------------------------------------------|
| Type                                  | Metalloid                                             | Transition metal                      | Post-transition metal                                                  |
| Electron configuration*               | [Ar] 4s <sup>2</sup> 3d <sup>10</sup> 4p <sup>3</sup> | [Kr] 5s <sup>2</sup> 4d <sup>10</sup> | [Xe] 6s <sup>2</sup> 4f <sup>14</sup> 5d <sup>10</sup> 6p <sup>2</sup> |
| Electronegativity (Pauling Scale) *   | 2.18                                                  | 1.69                                  | 2.33                                                                   |
| Atomic radius (van der Waals) [pm]*   | 185                                                   | 158                                   | 202                                                                    |
| WHO guideline (drinking water) [µg/L] | 10                                                    | 3                                     | 10                                                                     |

\*Based on PubChem database.

Figures

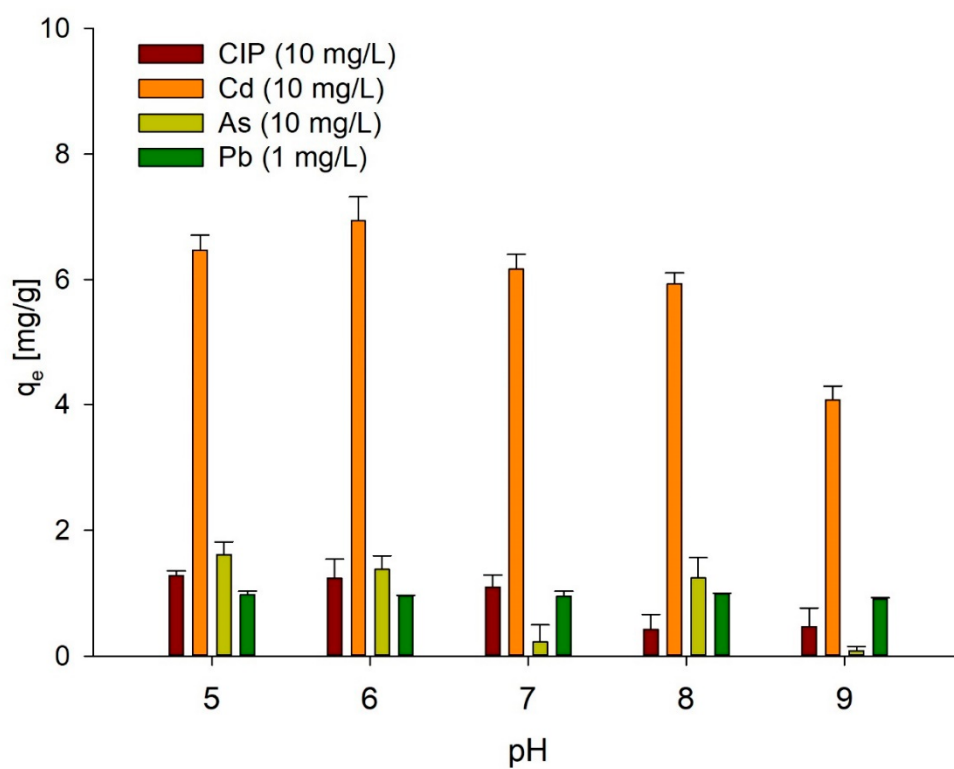

**Figure S1.** FTIR spectra of tested biochars; PW-BC pinewood biochar, PM-BC pig manure biochar, AS-BC almond shell biochar.

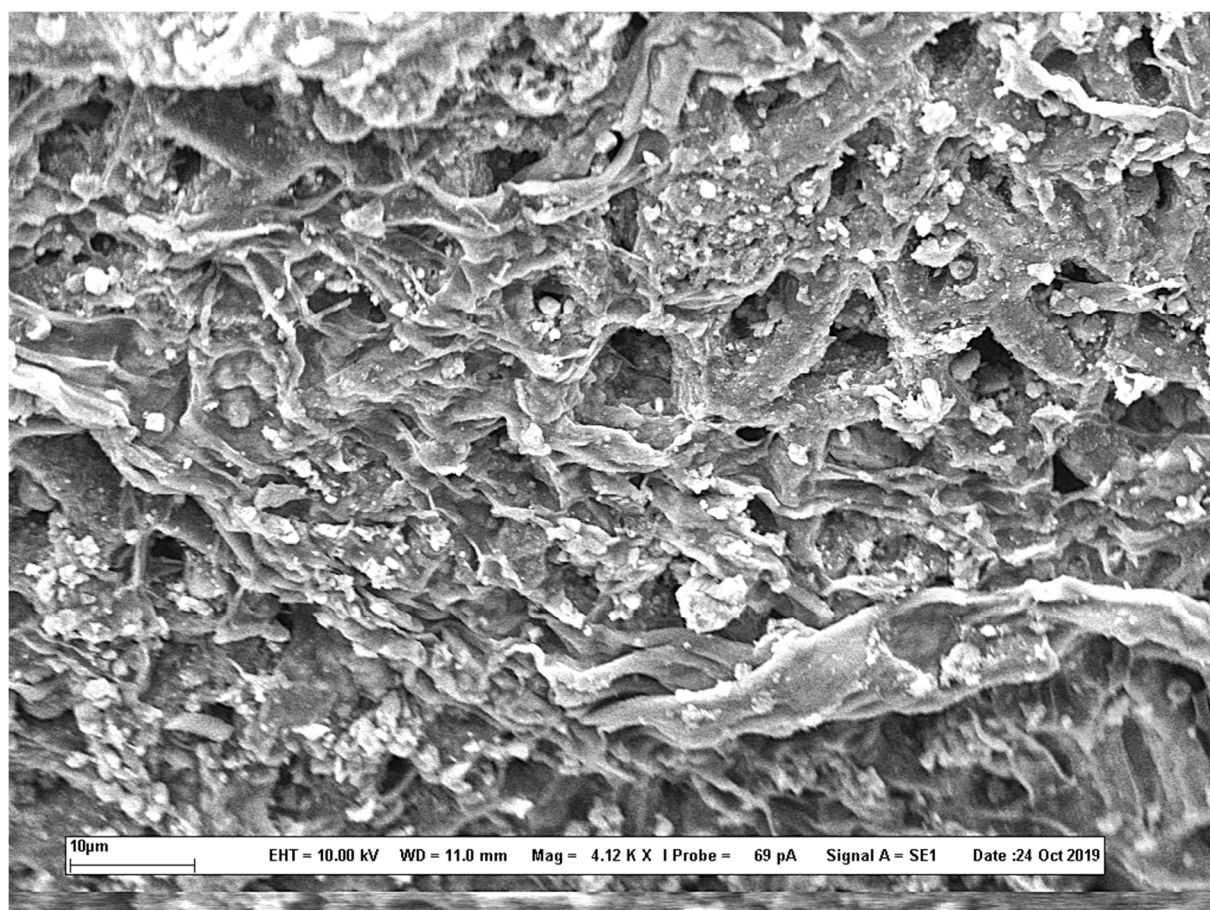

**Figure S2.** SEM images of pig manure biochar.

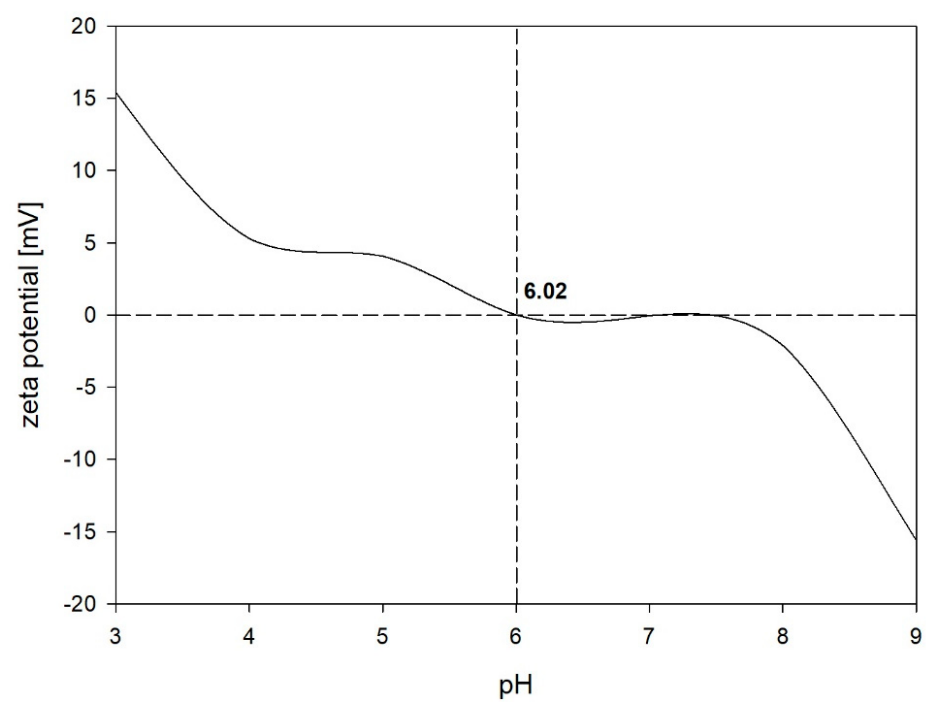

**Figure S3.** The isoelectric point of CH-BB.

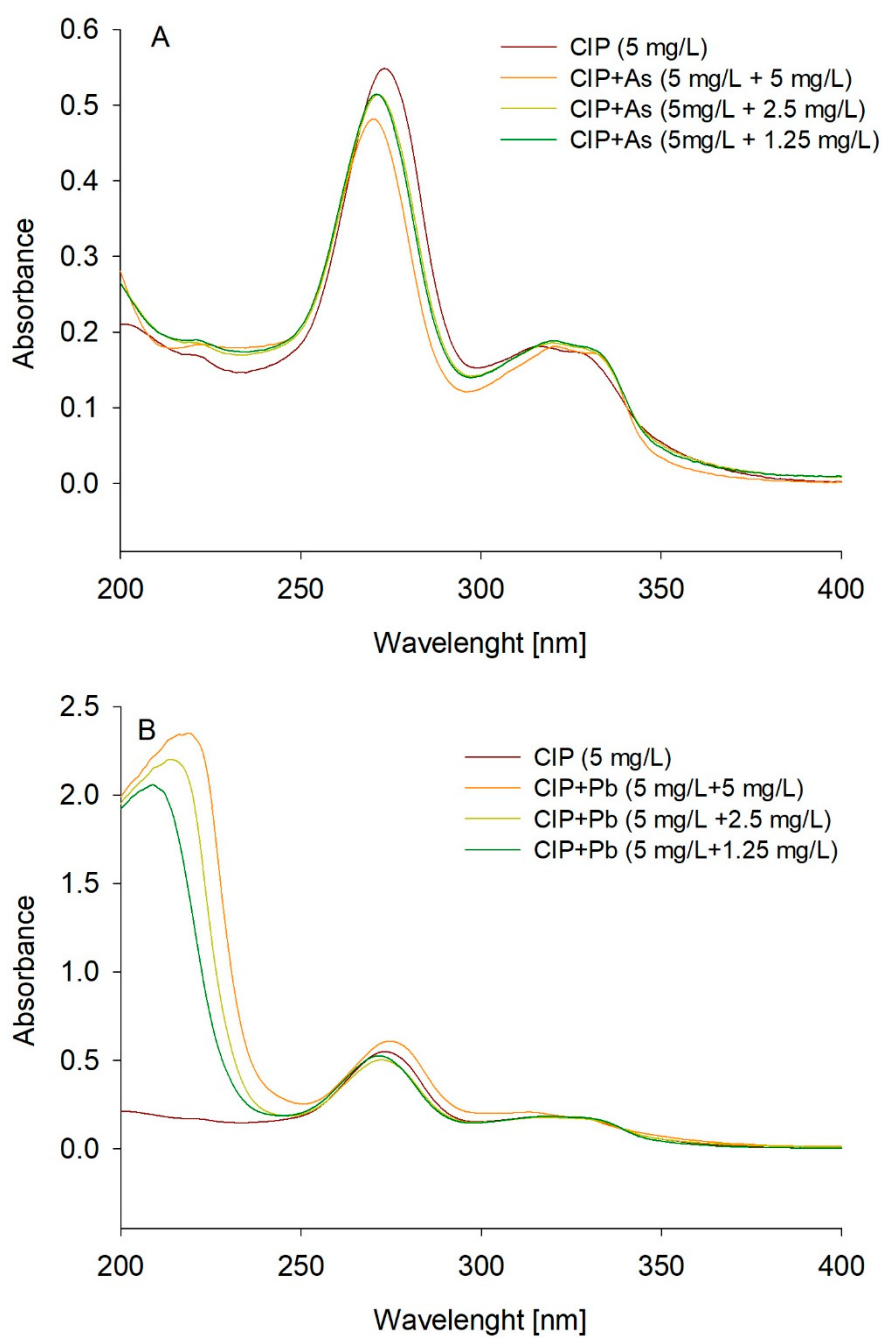

**Figure S4.** UV-Vis absorption spectra of ciprofloxacin (CIP) in the presence of different concentrations of A. As; B. Pb.
